# Supplementary material for: A guanine-flipping and sequestration mechanism for G-quadruplex unwinding by RecQ helicases
Source: PubMed Central journal article supplement (PMC6180126; doi:10.1038/s41467-018-06751-8), 2018-10-10
Supplement: 41467_2018_6751_MOESM1_ESM.pdf [file 41467_2018_6751_MOESM1_ESM.pdf]

Supplementary Information for

**A guanine-flipping and sequestration mechanism for G-quadruplex  
unwinding by RecQ helicases**

**Authors:** Andrew F. Voter<sup>1</sup>, Yupeng Qiu<sup>2</sup>, Ramreddy Tippana<sup>2</sup>, Sua Myong<sup>2</sup>, James L. Keck<sup>1</sup>

## Supplementary Figure 1.

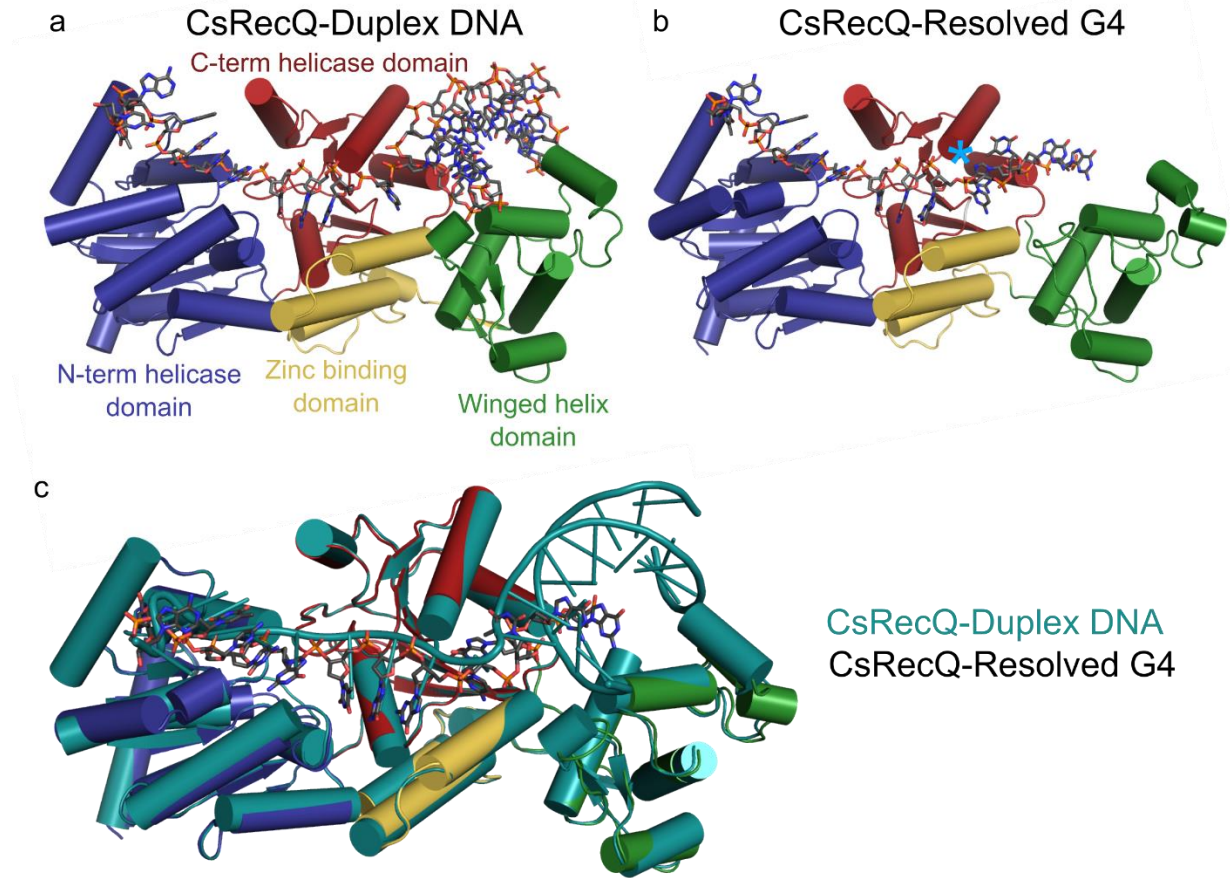

**Supplementary Figure 1. RecQ adopts a similar confirmation when bound to duplex DNA or a resolved G4.** a) Structure of CsRecQ bound to duplex DNA (PDB 4TMU)<sup>1</sup>. b) Structure of CsRecQ bound to a resolved G4 (PDB 6CRM). The flipped guanine is marked by a teal asterisk c) Overlay of the structure from a and b. The CsRecQ-Duplex DNA is colored in teal with the CsRecQ/G4 product structure colored as in b.

**Supplementary Figure 2.**

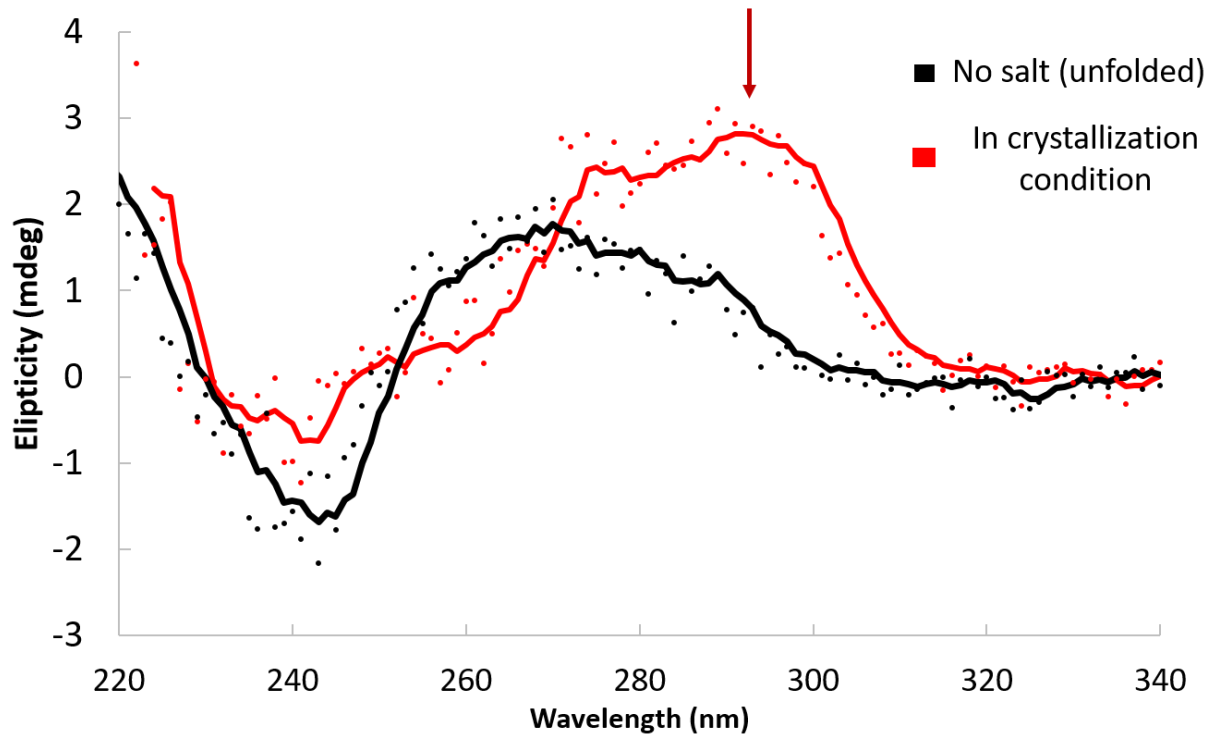

**Supplementary Figure 2. Crystallization conditions support antiparallel G4 formation.**

Circular dichroic spectra of G4-folding DNA in either no salt conditions (black) or the crystallization conditions (red). Line represent the rolling average of the CD values shown by the individual points. Presence of a positive CD signal at 290 nm (arrow) indicates the formation of antiparallel G4 DNA.

**Supplementary Figure 3.**

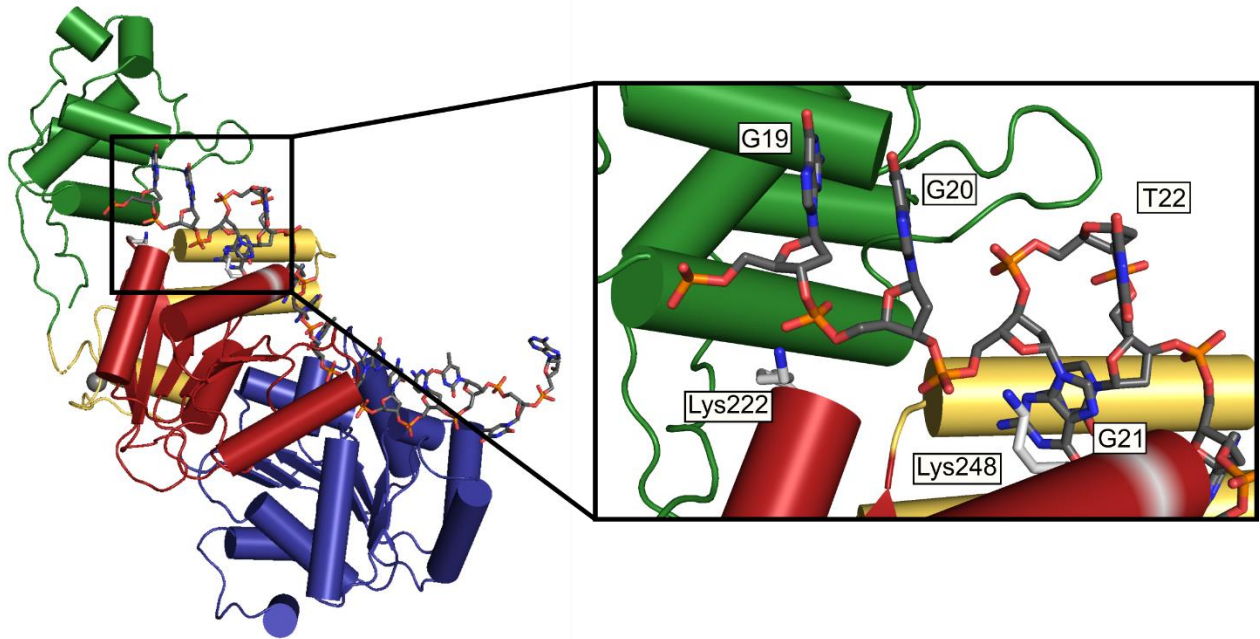

**Supplementary Figure 3. Interaction between RecQ and the resolved G4.** The resolved G4 DNA (gray sticks) is held against the face of the CsRecQ helicase domain (red cartoon) by Lys222 and Lys248 (white sticks).

#### Supplementary Figure 4

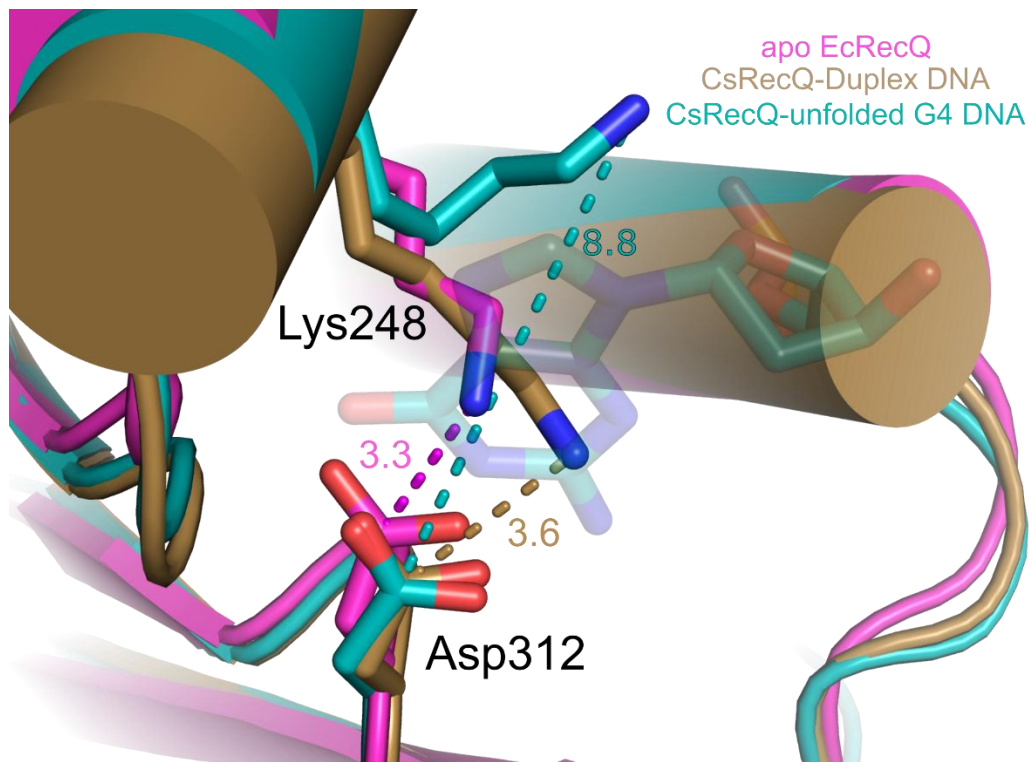

**Supplementary Figure 4. The RecQ GSP is closed unless bound to resolved G4 DNA.** The GSP in both apo EcRecQ (magenta, PDB 1OYW<sup>2</sup>) and duplex DNA-bound CsRecQ (yellow, PDB 4TMU<sup>1</sup>) is closed by interaction between Lys248 and Asp312, but is opened in the G4 product complex (teal, PDB 6CRM). Dashed lines and distances (Å) denote the distances between the  $\epsilon$ -amino group of Lys248 and the carbon of the carboxylic acid group of Asp312.

### Supplementary Figure 5.

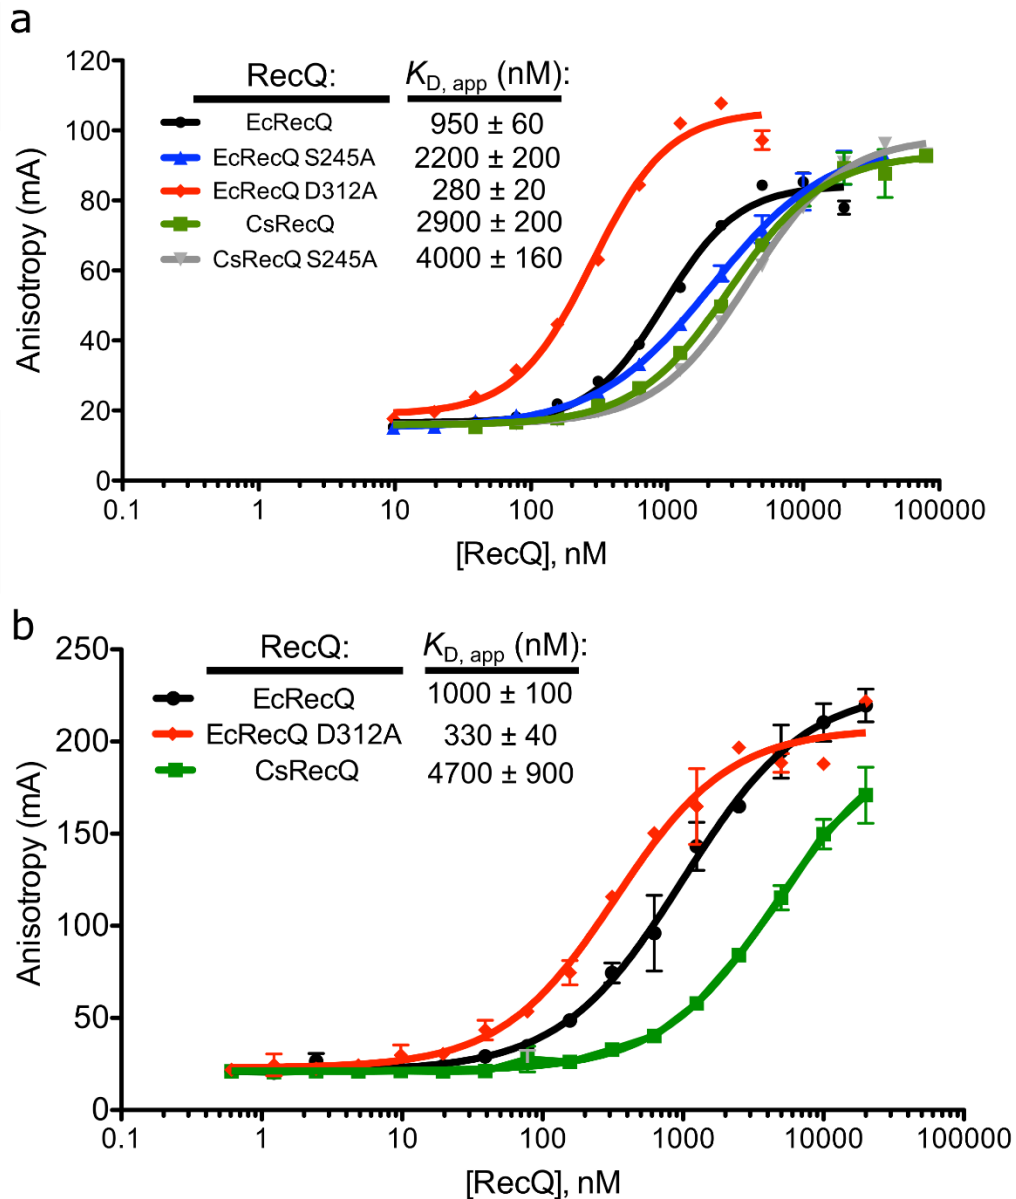

**Supplementary Figure 5. Duplex and G4 binding of RecQ variants.** a) Fluorescence anisotropy of folded G4 DNA incubated with increasing concentrations of each RecQ variant. Apparent dissociation constants ( $K_{D, app}$ ) are reported  $\pm 1$  standard deviation. Error bars represent the SEM of 2 replicates. b) Fluorescence anisotropy of duplex DNA substrates incubated with increase concentrations of each RecQ variant. Error bars represent the SEM of 3 replicates.

Supplementary Figure 6.

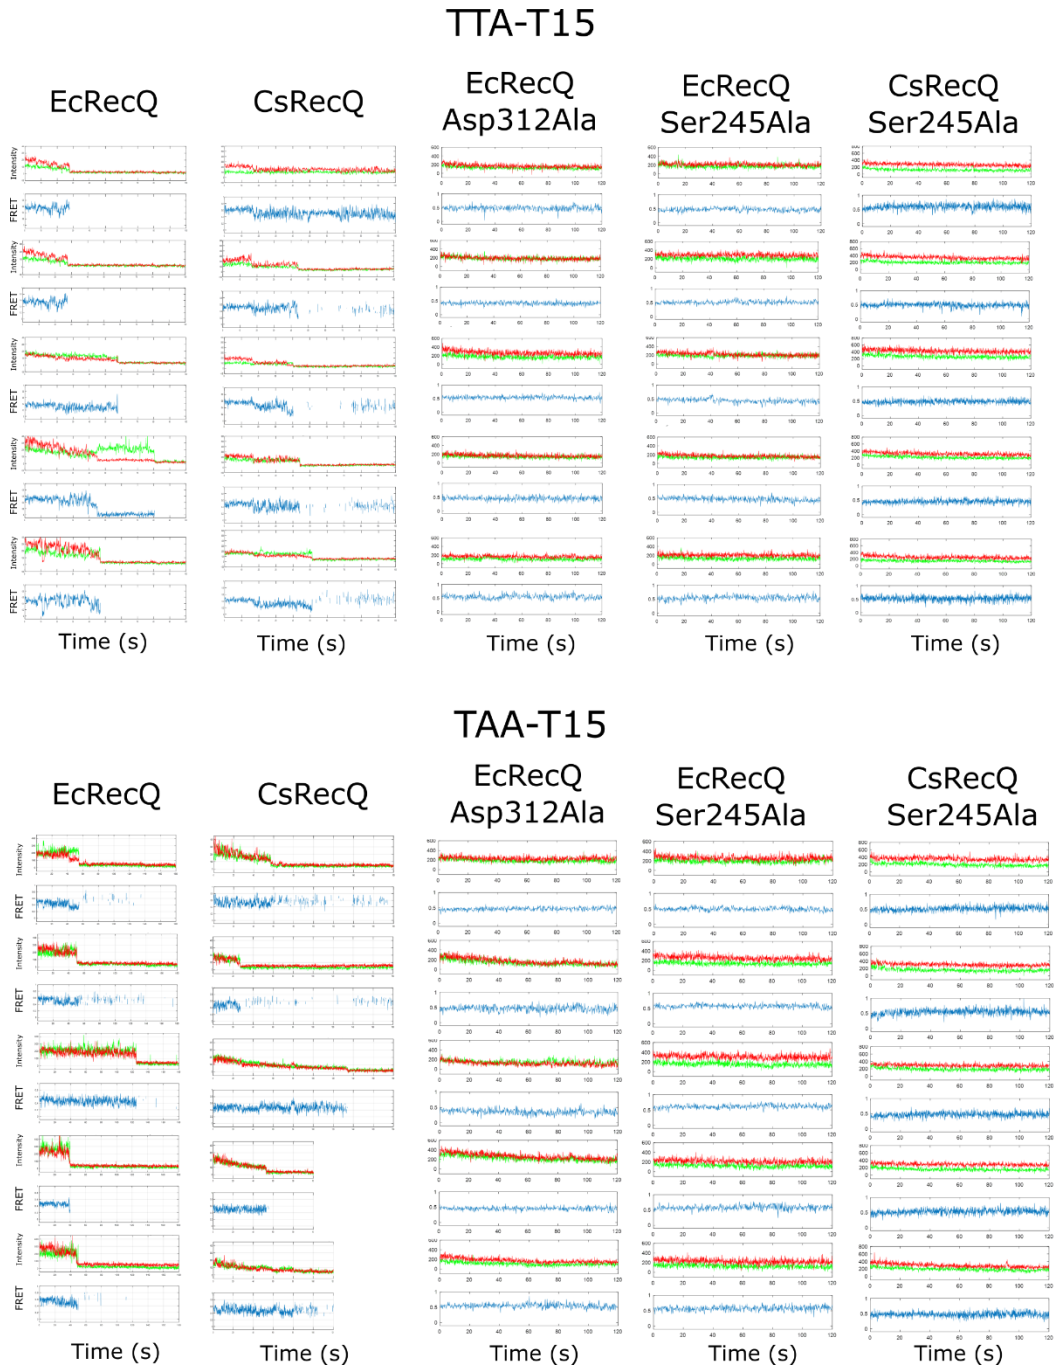

Supplementary Figure 6. Representative single molecule traces of G4 unwinding by RecQ variants.

Supplementary Figure 7

dT15

EcRecQ

CsRecQ

EcRecQ  
Asp312Ala

EcRecQ  
Ser245Ala

CsRecQ  
Ser245Ala

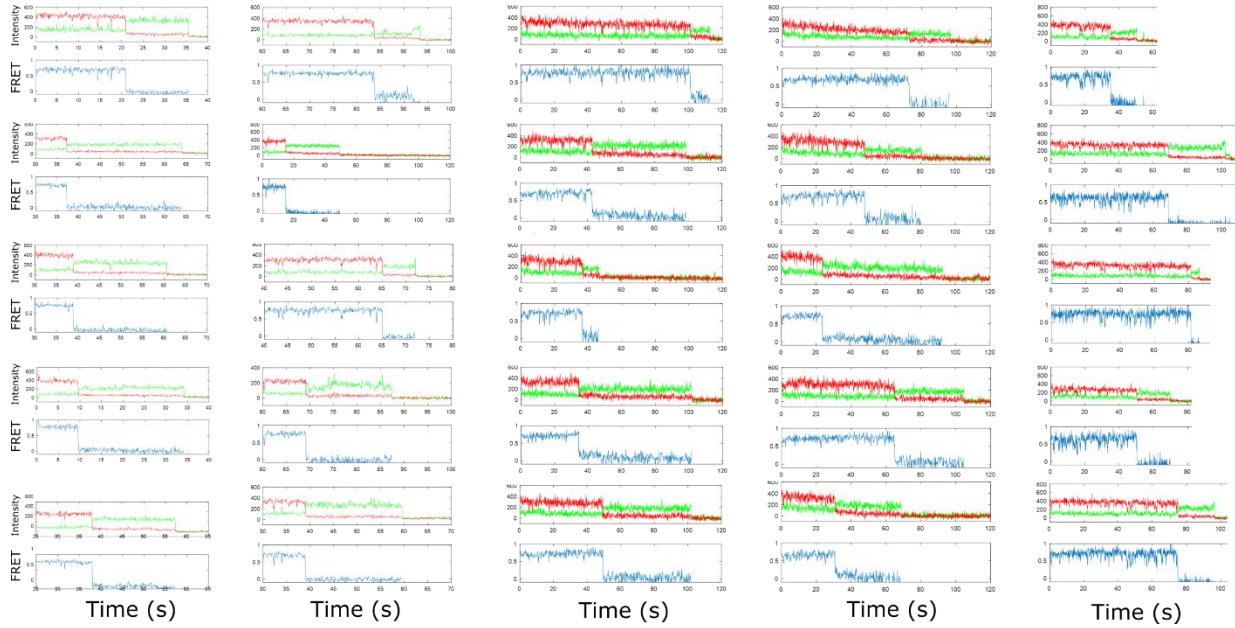

Supplementary Figure 7. Representative single molecule traces of duplex unwinding by RecQ variants.



## Supplementary Figure 8.

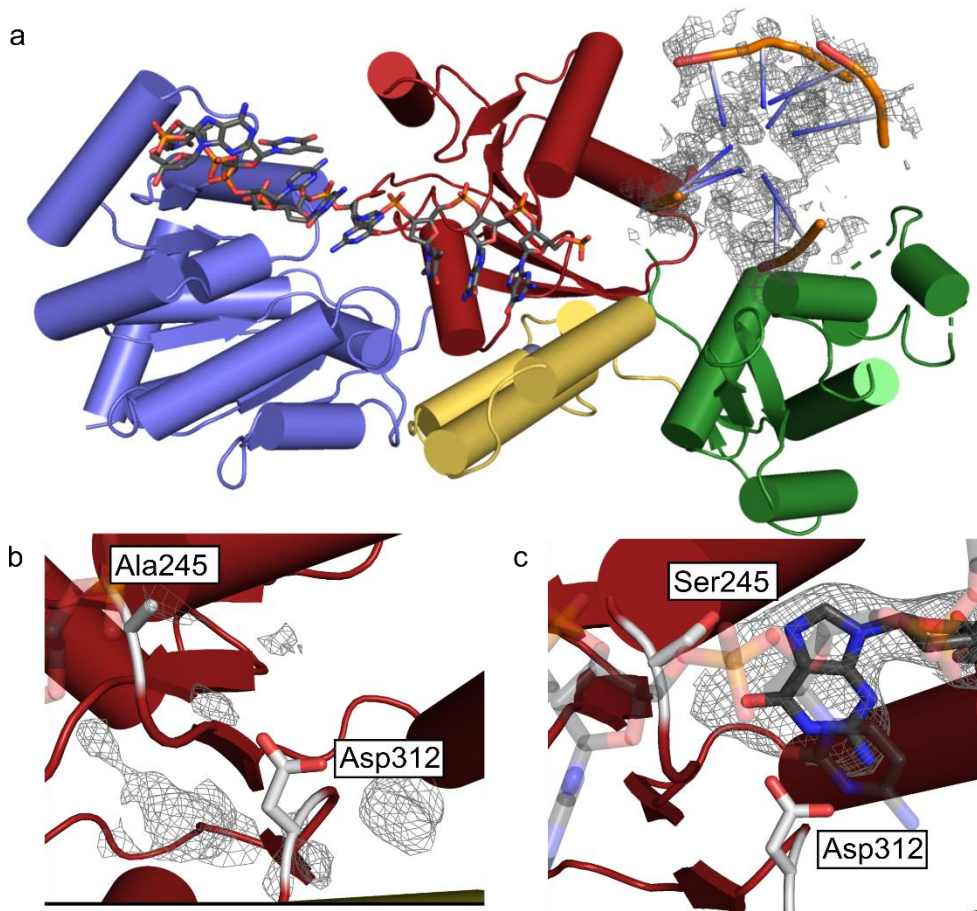

**Supplementary Figure 8. Structure of Ser245Ala CsRecQ bound to G4 DNA.** a)  $F_o-F_c$  electron density map (contoured at  $1.7\sigma$ ) showing significant but discontinuous electron density within the helicase/winged-helix domain cleft. A G4 structure (PDB 143D)<sup>3</sup> is shown within the map for scale. b).  $F_o-F_c$  electron density map of the CsRecQ Ser245Ala (contoured at  $2.0\sigma$ ) showing that a guanine is not found in the GSP. c)  $F_o-F_c$  omit electron density map of the CsRecQ/G4 product complex (contoured at  $2.0\sigma$ ) with a flipped guanine for comparison.

**Supplementary Figure 9**

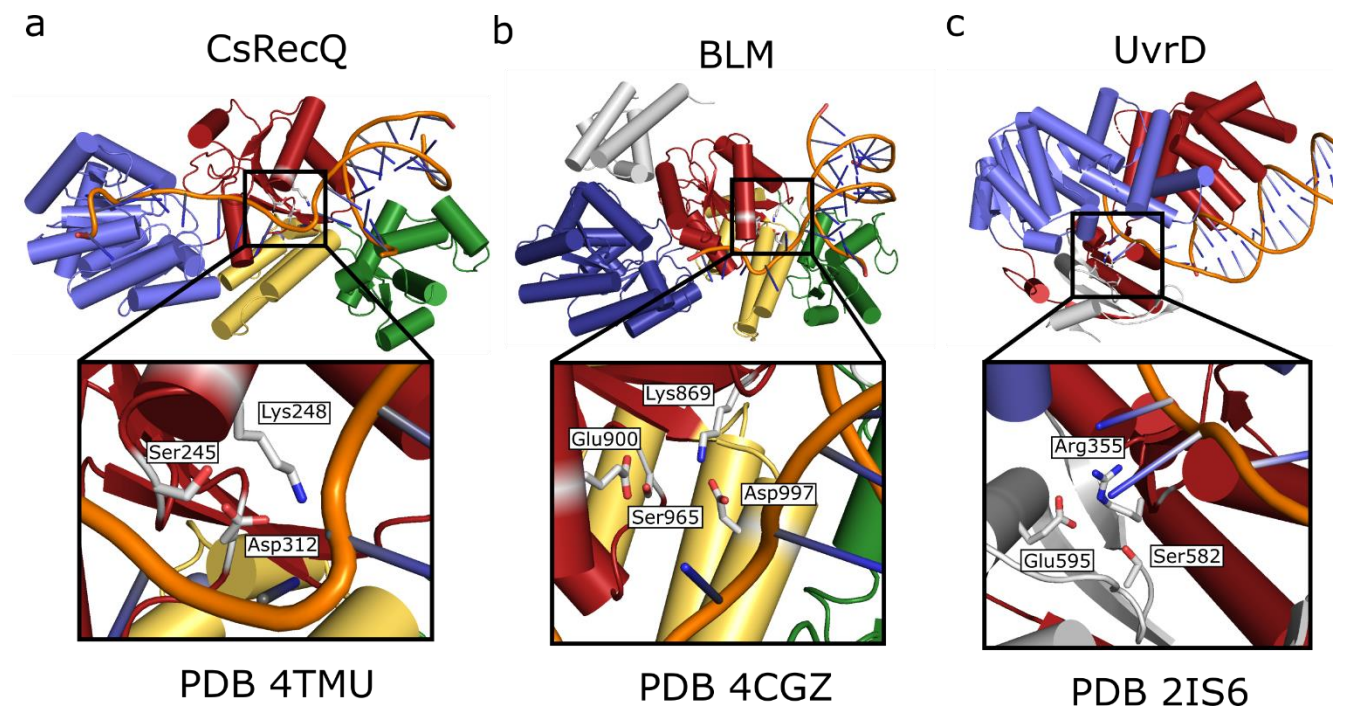

**Supplementary Figure 9. Possible structural conservation of the GSP in other G4 resolving helicases.** a) The CsRecQ GSP (PDB 4TMU)<sup>1</sup>. b) Pockets with similarity to the RecQ GSP are found in comparable positions in BLM (PDB 4CGZ)<sup>4</sup> and c) in UvrD (PDB 2IS6)<sup>5</sup> helicases.

### Supplementary Figure 10

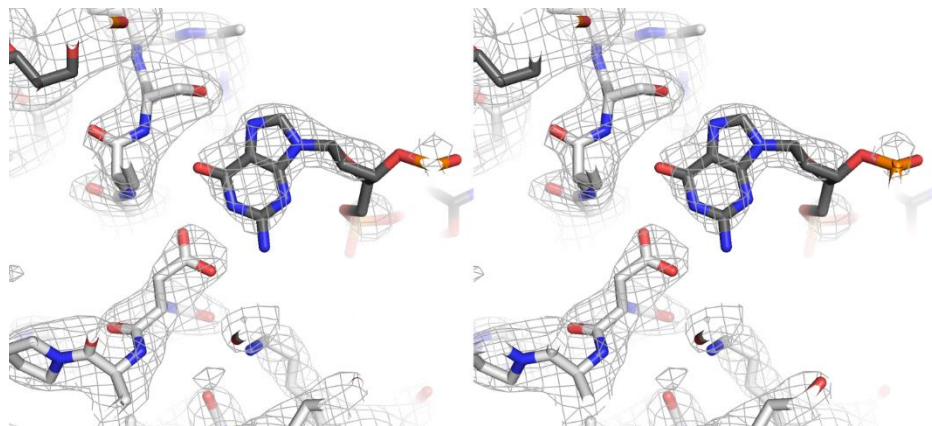

**Supplementary Figure 10. Electron density of the refined structure.** Stereo image of the refined GSP of the RecQ (white stick) and resolved G4 (grey stick) complex. The  $2F_o-F_c$  electron density contoured at  $1.5\sigma$  is shown.

**Supplementary Table 1.** Nucleotide sequence of the primers used in this study.

| <b>Primer</b>   | <b>Nucleotide sequence</b>                                                              |
|-----------------|-----------------------------------------------------------------------------------------|
| G4 DNA          | 5'-TTA GGG TTA GGG TTA GGG TTA GGG TCG GTG CCT TAC T-3'                                 |
| F-G4            | 5'-TTA GGG TTA GGG TTA GGG TTA GGG TCG GTG CCT TAC T-FAM-<br>3'                         |
| Duplex 1        | 5'-GCG TGG GTA ATT GTG CTT CAA TGG ACT GAC-FAM3'                                        |
| Duplex 2        | 5'-AAG CAC AAT TAC CCA CGC-3'                                                           |
| Common 18mer    | 5'-Cy5-GCC TCG CTG CCG TCG CCA-biotin-3'                                                |
| Non-G4 DNA, T18 | 5'-TGG CGA CGG CAG CGA GGC-(T) <sub>18</sub> -Cy3-3                                     |
| TTA-T15 DNA:    | 5'-TGG CGA CGG CAG CGA GGC TTA GGG TTA GGG TTA GGG TTA<br>GGG-(T) <sub>15</sub> -Cy3-3' |
| TAA-T15 DNA     | 5'-TGG CGA CGG CAG CGA GGC TTG GGT AAG GGT AAG GGT AAG<br>GG-(T) <sub>15</sub> -Cy3-3'  |
| c-myc-T15 DNA   | 5'-TGG CGA CGG CAG CGA GGC GGG TGG GTA GGG TGG G-(T) <sub>15</sub> -<br>Cy3-3'          |

### Supplementary References.

1. Tippana, R., Hwang, H., Opresko, P. L., Bohr, V. A. & Myong, S. Single-molecule imaging reveals a common mechanism shared by G-quadruplex-resolving helicases. *Proc. Natl. Acad. Sci.* **113**, 8448-8453 (2016).
2. Bernstein, D. A., Zittel, M. C. & Keck, J. L. High-resolution structure of the E.coli RecQ helicase catalytic core. *EMBO J.* **22**, 4910-4921 (2003).
3. Wang, Y. and Patel, D. J. Solution structure of the human telomeric repeat d[AG3(T2AG3)3] G-tetraplex. *Structure* **1**(4): 263-282 (1993).
4. Newman, J. A. *et al.* Crystal structure of the Bloom's syndrome helicase indicates a role for the HRDC domain in conformational changes. *Nucleic Acids Res* **43**, 5221-5235 (2015).
5. Lee, J. Y. & Yang, W. UvrD helicase unwinds DNA one base pair at a time by a two-part power stroke. *Cell* **127**, 1349-1360 (2006).
